# Supplementary material for: Integrating Kinetic Model of E. coli with Genome Scale Metabolic Fluxes Overcomes Its Open System Problem and Reveals Bistability in Central Metabolism
Source: PubMed Central journal article supplement (PMC4607504; doi:10.1371/journal.pone.0139507), 2015-10-15
Supplement: pone.0139507.s001.pdf [file pone.0139507.s001.pdf]

# S1 Fig: Recalculation of Biomass Reaction Stoichiometry Coefficients

Calculating Molar Mass Of Biomass From Adjusted GSM: A copy of the Feist *et al* (2007) paper supplementary File 3, Ecoli CORE Biomass Objective Function

These are the stoichiometric coefficients calculated/normalized in such a way as to produce 1 mmol/gDW of biomass.

| Macromolecule  | Overall wt% (wild type) | Composition (molar fraction) | mmol/gDW (from Keio) | Metabolite  | formula        | MW (mg/mmol) | mg (if total 1 mmol) | Composition (Weight Fraction) | g/gDW      | StoichCoeffs (mmol/gDW) |           |          |
|----------------|-------------------------|------------------------------|----------------------|-------------|----------------|--------------|----------------------|-------------------------------|------------|-------------------------|-----------|----------|
| Protein        | 0.55                    | 0.112                        | 0.511785             | ala-L       | C3H7NO2        | 89.094       | 7.930335             | 7.342%                        | 0.042542   | 0.598516                |           |          |
|                |                         | 0.047                        | 0.215270             | arg-L       | C6H15N4O2      | 175.212      | 7.377180             | 6.830%                        | 0.039575   | 0.251751                |           |          |
|                |                         | 0.053                        | 0.242081             | asn-L       | C4H8N2O3       | 132.119      | 6.021771             | 5.575%                        | 0.032304   | 0.283106                |           |          |
|                |                         | 0.053                        | 0.242081             | asp-L       | C4H6NO4        | 132.095      | 6.020504             | 5.574%                        | 0.032297   | 0.283106                |           |          |
|                |                         | 0.007                        | 0.031627             | cys-L       | C3H7NO2S       | 121.16       | 0.711162             | 0.658%                        | 0.003815   | 0.036987                |           |          |
|                |                         | 0.063                        | 0.288199             | gln-L       | C5H11NO2O3     | 146.146      | 8.050249             | 7.453%                        | 0.043185   | 0.337039                |           |          |
|                |                         | 0.063                        | 0.288199             | glu-L       | C5H8NO4        | 146.122      | 8.048741             | 7.452%                        | 0.043177   | 0.337039                |           |          |
|                |                         | 0.102                        | 0.466045             | gly         | C2H5NO2        | 75.067       | 5.796440             | 5.367%                        | 0.031095   | 0.545025                |           |          |
|                |                         | 0.019                        | 0.085696             | his-L       | C6H9NO2        | 155.157      | 2.562086             | 2.372%                        | 0.013744   | 0.100219                |           |          |
|                |                         | 0.053                        | 0.240854             | ile-L       | C6H13NO2       | 131.175      | 5.941683             | 5.501%                        | 0.031874   | 0.281671                |           |          |
|                |                         | 0.091                        | 0.418445             | leu-L       | C6H13NO2       | 131.175      | 10.322716            | 9.557%                        | 0.055376   | 0.489358                |           |          |
|                |                         | 0.054                        | 0.248290             | lys-L       | C6H15N2O2      | 147.198      | 6.992416             | 6.474%                        | 0.037511   | 0.290367                |           |          |
|                |                         | 0.023                        | 0.105228             | met-L       | C5H11NO2S      | 149.214      | 3.009709             | 2.787%                        | 0.016145   | 0.123061                |           |          |
|                |                         | 0.037                        | 0.167676             | phe-L       | C9H11NO2       | 165.192      | 5.379891             | 4.981%                        | 0.028860   | 0.196092                |           |          |
|                |                         | 0.033                        | 0.152042             | pro-L       | C5H9NO2        | 115.132      | 3.219004             | 2.980%                        | 0.017268   | 0.177808                |           |          |
|                |                         | 0.044                        | 0.203616             | ser-L       | C3H7NO3        | 105.093      | 3.865298             | 3.579%                        | 0.020735   | 0.238122                |           |          |
|                |                         | 0.051                        | 0.235097             | thr-L       | C4H9NO3        | 119.12       | 5.181821             | 4.798%                        | 0.027798   | 0.274938                |           |          |
|                |                         | 0.008                        | 0.034770             | trp-L       | C11H12N2O2     | 204.229      | 1.411496             | 1.307%                        | 0.007572   | 0.040662                |           |          |
|                |                         | 0.020                        | 0.093267             | tyr-L       | C9H11NO3       | 181.191      | 3.317775             | 3.072%                        | 0.017798   | 0.109073                |           |          |
|                |                         | 0.069                        | 0.316823             | val-L       | C5H11NO2       | 117.148      | 6.846957             | 6.339%                        | 0.036730   | 0.370514                |           |          |
|                |                         | DNA                          | 0.031                | 0.246       | 0.026170       | dntp         | C10H12N5O12P3        | 487.151                       | 76.803218  | 24.982%                 | 0.008169  | 0.026166 |
|                |                         |                              |                      | 0.254       | 0.027020       | dctp         | C9H12N3O13P3         | 461.109                       | 72.683241  | 23.642%                 | 0.007731  | 0.027016 |
|                |                         |                              |                      | 0.254       | 0.027020       | dgtt         | C10H12N5O13P3        | 503.15                        | 83.361450  | 27.115%                 | 0.008867  | 0.027016 |
|                |                         |                              |                      | 0.246       | 0.026170       | dtpp         | C10H13N2O14P3        | 478.136                       | 74.585484  | 24.261%                 | 0.007933  | 0.026166 |
|                |                         | RNA                          | 0.205                | 0.240       | 0.064000       | ctp          | C9H12N3O14P3         | 479.124                       | 72.910861  | 22.579%                 | 0.048772  | 0.160340 |
|                |                         |                              |                      | 0.326       | 0.087000       | gtp          | C10H12N5O14P3        | 519.149                       | 112.155056 | 34.733%                 | 0.075023  | 0.217963 |
|                |                         |                              |                      | 0.206       | 0.055000       | utp          | C9H11N2O15P3         | 480.108                       | 62.860468  | 19.467%                 | 0.042049  | 0.137792 |
| 0.228          | 0.061000                |                              |                      | atp**       | C10H12N5O13P3  | 503.15       | 74.982251            | 23.221%                       | 0.050157   | 0.152824                |           |          |
| murein         | 0.025                   | 1                            | 0.013890             | murein5px4p | C77H117N15O40  | 1892.848     | 1892.848000          | 100.000%                      | 0.026300   | 0.013894                |           |          |
| LPS            | 0.034                   | 1                            | 0.019450             | kdo2lipid4  | C84H148N2O37P2 | 1840.033     | 1840.033000          | 100.000%                      | 0.035800   | 0.019456                |           |          |
| lipid          | 0.091                   | 0.4590                       | 0.022330             | pe160       | C37H74N1O8P1   | 691.972      | 317.610170           | 46.044%                       | 0.044157   | 0.063813                |           |          |
|                |                         | 0.5410                       | 0.026320             | pe161       | C37H70N1O8P1   | 687.94       | 372.180489           | 53.956%                       | 0.051743   | 0.075215                |           |          |
| inorganic ions | 0.01                    | 0.7256                       | 0.177600             | k           | K              | 38.9637      | 28.272171            | 65.884%                       | 0.006918   | 0.177545                |           |          |
|                |                         | 0.0484                       | 0.011843             | nh4         | H4N            | 18.039       | 0.872831             | 2.034%                        | 0.000214   | 0.011839                |           |          |
|                |                         | 0.0323                       | 0.007895             | mg2         | Mg             | 23.985       | 0.773656             | 1.803%                        | 0.000189   | 0.007893                |           |          |
|                |                         | 0.0194                       | 0.004737             | ca2         | Ca             | 39.9626      | 0.773416             | 1.802%                        | 0.000189   | 0.004736                |           |          |
|                |                         | 0.0290                       | 0.007106             | fe2         | Fe             | 55.9349      | 1.623918             | 3.784%                        | 0.000397   | 0.007104                |           |          |
|                |                         | 0.0290                       | 0.007106             | fe3         | Fe             | 55.9349      | 1.623918             | 3.784%                        | 0.000397   | 0.007104                |           |          |
|                |                         | 0.0129                       | 0.003158             | cu2         | Cu             | 63.546       | 0.819891             | 1.911%                        | 0.000201   | 0.003157                |           |          |
|                |                         | 0.0129                       | 0.003158             | mn2         | Mn             | 54.938       | 0.708828             | 1.652%                        | 0.000173   | 0.003157                |           |          |
|                |                         | 0.0129                       | 0.003158             | mobd        | MoO4           | 159.94       | 2.063599             | 4.809%                        | 0.000505   | 0.003157                |           |          |
|                |                         | 0.0129                       | 0.003158             | cobalt2     | Co             | 58.9332      | 0.760376             | 1.772%                        | 0.000186   | 0.003157                |           |          |
|                |                         | 0.0129                       | 0.003158             | zn2         | Zn             | 63.9291      | 0.824834             | 1.922%                        | 0.000202   | 0.003157                |           |          |
|                |                         | 0.0194                       | 0.004737             | cl          | Cl             | 34.9689      | 0.676770             | 1.577%                        | 0.000166   | 0.004736                |           |          |
|                |                         | 0.0161                       | 0.003948             | so4         | O4S            | 96.062       | 1.549476             | 3.611%                        | 0.000379   | 0.003947                |           |          |
|                |                         | 0.0163                       | 0.004000             | pi**        | HO4P           | 95.978       | 1.568511             | 3.655%                        | 0.000384   | 0.003999                |           |          |
|                |                         | soluble pool                 | 0.029                | 0.1074      | 0.000576       | coa          | C21H32N7O16P3S       | 763.508                       | 82.018017  | 12.851%                 | 0.000437  | 0.000572 |
|                |                         |                              |                      | 0.3415      | 0.001831       | nad          | C21H26N7O14P2        | 662.422                       | 226.201918 | 35.443%                 | 0.001205  | 0.001819 |
| 0.0834         | 0.000447                |                              |                      | nadp        | C21H25N7O17P3  | 740.385      | 61.721763            | 9.671%                        | 0.000329   | 0.000444                |           |          |
| 0.0416         | 0.000223                |                              |                      | fad         | C27H31N9O15P2  | 783.541      | 32.586655            | 5.106%                        | 0.000174   | 0.000222                |           |          |
| 0.0416         | 0.000223                |                              |                      | thf         | C19H21N7O6     | 443.42       | 18.441376            | 2.890%                        | 0.000098   | 0.000222                |           |          |
| 0.0416         | 0.000223                |                              |                      | mlthf       | C20H21N7O6     | 455.431      | 18.940901            | 2.968%                        | 0.000101   | 0.000222                |           |          |
| 0.0416         | 0.000223                |                              |                      | 10ftthf     | C20H21N7O7     | 471.43       | 19.606283            | 3.072%                        | 0.000104   | 0.000222                |           |          |
| 0.0416         | 0.000223                |                              |                      | thmpp       | C12H16N4O7P2S  | 422.295      | 17.562810            | 2.752%                        | 0.000094   | 0.000222                |           |          |
| 0.0416         | 0.000223                |                              |                      | pydx5p      | C8H8NO6P       | 245.127      | 10.194577            | 1.597%                        | 0.000054   | 0.000222                |           |          |
| 0.0416         | 0.000223                |                              |                      | pHEME       | C34H30FeN4O4   | 614.5729     | 25.559447            | 4.005%                        | 0.000136   | 0.000222                |           |          |
| 0.0416         | 0.000223                |                              |                      | sheme       | C42H36FeN4O16  | 1355.912     | 56.390969            | 8.836%                        | 0.000300   | 0.000222                |           |          |
| 0.0103         | 0.000055                |                              |                      | udcpdp      | C55H89O7P2     | 924.258      | 9.480453             | 1.485%                        | 0.000051   | 0.000055                |           |          |
| 0.0416         | 0.000223                |                              |                      | amet        | C15H23N6O5S    | 399.452      | 16.612793            | 2.603%                        | 0.000089   | 0.000222                |           |          |
| 0.0416         | 0.000223                |                              |                      | zohph       | C46H70O2       | 655.064      | 27.243430            | 4.269%                        | 0.000145   | 0.000222                |           |          |
| 0.0416         | 0.000223                |                              |                      | ribfv       | C17H20N4O6     | 376.369      | 15.652795            | 2.453%                        | 0.000083   | 0.000222                |           |          |
|                |                         |                              |                      | 1           | 93.700200      | atp**        | C10H12N5O13P3        | 503.15                        |            |                         | 93.608376 |          |
|                |                         |                              |                      | 1           | 93.700200      | h2o**        | H2O                  | 18.015                        |            |                         | 93.608376 |          |
|                |                         |                              |                      |             | 93.761200      | atp**        |                      |                               |            |                         | 93.761200 |          |
|                |                         |                              |                      |             | 88.352200      | h2o**        |                      |                               |            |                         | 84.838026 |          |
|                |                         |                              |                      | 1           | 93.700200      | adp          | C10H12N5O10P2        | 424.179                       |            |                         | 93.608376 |          |
|                |                         |                              |                      | 1           | 93.700200      | h            | H                    | 1.008                         |            |                         | 93.608376 |          |
|                |                         | 1                            | 93.700200            | pi**        | HO4P           | 95.978       |                      |                               | 93.608376  |                         |           |          |
|                |                         |                              | 0.106365             | ppi**       | HO7P2          | 174.949      |                      |                               | 0.106365   |                         |           |          |
|                |                         |                              | 0.667538             | ppi**       | HO7P2          | 174.949      |                      |                               | 0.667538   |                         |           |          |
|                |                         |                              | 5.348000             | h2o**       | H2O            | 18.015       |                      |                               | 8.770350   |                         |           |          |
|                |                         |                              | 0.773900             | ppi**       | HO4P           | 95.978       |                      |                               | 0.773900   |                         |           |          |
|                |                         |                              | 93.696200            | pi**        | HO4P           | 95.978       |                      |                               | 93.604377  |                         |           |          |

A snapshot of the excel spreadsheet used to recalculate the biomass reaction stoichiometric coefficients, based on the spreadsheet and calculations published by Feist *et al*, (2007). The calculations can be obtained from the respective excel sheet of the supplementary information of the paper of Feist *et al*, (2007).
