# Supplementary material for: Integrating Kinetic Model of E. coli with Genome Scale Metabolic Fluxes Overcomes Its Open System Problem and Reveals Bistability in Central Metabolism
Source: PubMed Central journal article supplement (PMC4607504; doi:10.1371/journal.pone.0139507), 2015-10-15
Supplement: pone.0139507.s002.pdf [file pone.0139507.s002.pdf]

# S2 Fig: Reparameterization of Genome-Scale Model

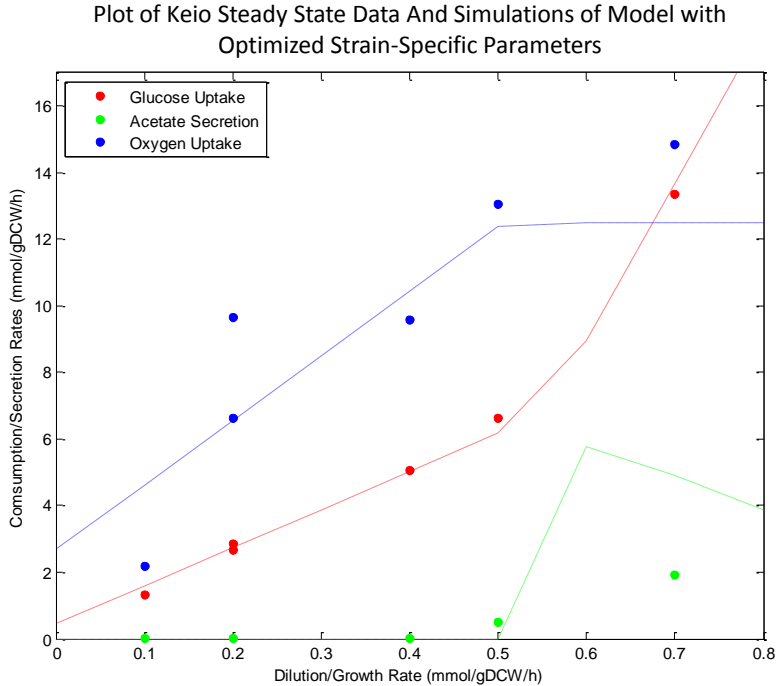

Plot of the optimized fitting between the Keio steady state data (dots) and simulations of the genome-scale model using the optimized strain-specific parameter values.
