# Supplementary material for: Integrating Kinetic Model of E. coli with Genome Scale Metabolic Fluxes Overcomes Its Open System Problem and Reveals Bistability in Central Metabolism
Source: PubMed Central journal article supplement (PMC4607504; doi:10.1371/journal.pone.0139507), 2015-10-15
Supplement: pone.0139507.s006.pdf [file pone.0139507.s006.pdf]

## S1 Table: Eigenvalue Analysis of Steady States

All eigenvalues were calculated from the eigenvalue analysis of a numerically estimated Jacobian, as calculated using the software MatLab.

TableS1 Table: Eigenvalues of System Evaluated Near Co-existing Alternative Steady State ( $1 \times 10^6$ )

|         |         |         |         |         |                   |                   |
|---------|---------|---------|---------|---------|-------------------|-------------------|
| -0.0000 | -1.7984 | -0.2967 | -0.2580 | -0.0940 | -0.0241 - 0.0053i | -0.0241 + 0.0053i |
| -0.0776 | -0.0691 | -0.0399 | -0.0391 | -0.0370 | -0.0081 - 0.0054i | -0.0081 + 0.0054i |
| -0.0333 | -0.0127 | -0.0110 | -0.0064 | -0.0037 | -0.0108 - 0.0018i | -0.0108 + 0.0018i |
| -0.0000 | -0.0004 | -0.0026 | -0.0015 | -0.0015 | -0.0002 - 0.0008i | -0.0002 + 0.0008i |
| 0       | 0       | 0       |         |         |                   |                   |

The value of the real part of all eigenvalues are negative numbers, indicative of a stable steady state.
