# Supplementary material for: Integrating Kinetic Model of E. coli with Genome Scale Metabolic Fluxes Overcomes Its Open System Problem and Reveals Bistability in Central Metabolism
Source: PubMed Central journal article supplement (PMC4607504; doi:10.1371/journal.pone.0139507), 2015-10-15
Supplement: pone.0139507.s008.pdf [file pone.0139507.s008.pdf]

## S3 Table: Table of Mathematical Reaction Equations

Table S3: Kinetic Model Reaction Equations

| Reaction | Reaction Equation                                                                                                                                                                                                                                                                                                                                                                                                    |      |
|----------|----------------------------------------------------------------------------------------------------------------------------------------------------------------------------------------------------------------------------------------------------------------------------------------------------------------------------------------------------------------------------------------------------------------------|------|
| PTS      | $v_{PTS} = \frac{v_{max}^{PTS} * glcD * \frac{pep}{pyr}}{(K_{a1} + (K_{a2} * \frac{pep}{pyr}) + (K_{a3} * glcD) + (glcD * \frac{pep}{pyr})) * (1 + \frac{g6p^n}{K_{g6p}})}$                                                                                                                                                                                                                                          | [1]  |
| PGMT     | $v_{PGMT} = \frac{v_{max}^{PGMT} * \left( g6p - \left( \frac{g1p}{K_{eq}} * 1 + \frac{accoa}{K_{i_{accoa}}} + \frac{1}{K_{i_{succoa}}} + \frac{coa}{K_{i_{coa}}} \right) \right)}{(K_{g6p} * (1 + \frac{g1p}{K_{g1p}})) + (g6p * (1 + \frac{accoa}{K_{i_{accoa}}}))}$                                                                                                                                                | [2]  |
| PGI      | $v_{PGI} = \frac{v_{max}^{PGI} * \left( g6p - \frac{f6p}{K_{eq}} \right)}{\left( K_{g6p} * \left( 1 + \frac{f6p}{K_{f6p} * \left( 1 + \frac{6pgc}{K_{6pginhg6p}}} \right)} + \frac{6pgc}{K_{6pginhg6p}} \right) \right) + g6p}$                                                                                                                                                                                      | [3]  |
| PFK      | $v_{PFK} = \frac{v_{max}^{PFK} * atp * f6p}{\left( atp + \left( K_{atps} * \left( 1 + \frac{adp}{K_{adpc}} \right) \right) \right) * \left( f6p + \left( K_{f6ps} * \frac{A}{B} \right) \right) * \left( 1 + \frac{L}{\left( 1 + f6p * \frac{B}{K_{f6ps} * A} \right)^n} \right)}$ $A = 1 + \frac{pep}{K_{pep}} + \frac{adp}{K_{adpb}} + \frac{amp}{K_{ampb}}$ $B = 1 + \frac{adp}{K_{adpa}} + \frac{amp}{K_{ampa}}$ | [4]  |
| FBA      | $v_{FBA} = \frac{v_{max}^{FBA} * \left( fdp - \frac{g3p * dhap}{K_{eq}} \right)}{K_{fdp} + fdp + \left( \frac{K_{g3p} * dhap}{K_{eq} * v_{blf}} \right) + \left( \frac{K_{dhap} * g3p}{K_{eq} * v_{blf}} \right) + \left( \frac{fdp * g3p}{K_{inhg3p}} \right) + \left( \frac{g3p * dhap}{K_{eq} * v_{blf}} \right)}$                                                                                                | [5]  |
| TPI      | $v_{TPI} = \frac{v_{max}^{TPI} * \left( dhap - \frac{g3p}{K_{eq}} \right)}{K_{dhap} * \left( 1 + \frac{g3p}{K_{g3p}} \right) + dhap}$                                                                                                                                                                                                                                                                                | [6]  |
| GAPD     | $v_{GAPD} = \frac{v_{max}^{GAPD} * \left( g3p * nad - \frac{13dpg * nadh}{K_{eq}} \right)}{\left( K_{g3p} * \left( 1 + \frac{13dpg}{K_{pgp}} \right) + g3p \right) * \left( K_{nad} * \left( 1 + \frac{nadh}{K_{nadh}} \right) + nad \right)}$                                                                                                                                                                       | [7]  |
| PGK      | $v_{PGK} = \frac{v_{max}^{PGK} * \left( adp * 13dpg - \frac{atp * 3pg}{K_{eq}} \right)}{\left( K_{adp} * \left( 1 + \frac{atp}{K_{atp}} \right) + adp \right) * \left( K_{13dpg} * \left( 1 + \frac{3pg}{K_{3pg}} \right) + 13dpg \right)}$                                                                                                                                                                          | [8]  |
| PGM      | $v_{PGM} = \frac{(v_{max} * \frac{3pg}{K_{3pg}}) - (v_{max} * \frac{2pg}{K_{2pg}})}{1 + \frac{2pg}{K_{2pg}} + \frac{3pg}{K_{3pg}}}$                                                                                                                                                                                                                                                                                  | [9]  |
| ENO      | $v_{ENO} = \frac{v_{max}^{ENO} * \left( 2pg - \frac{pep}{K_{eq}} \right)}{K_{2pg} * \left( 1 + \frac{pep}{K_{pep}} \right) + 2pg}$                                                                                                                                                                                                                                                                                   | [10] |
| PYK      | $v_{PYK} = \frac{v_{max}^{PYK} * pep * \left( \frac{pep}{K_{pep}} + 1 \right)^{(n-1)} * adp}{K_{pep} * \left( L * \left( \frac{1 + \frac{atp}{K_{atp}}}{\frac{fdp}{K_{fdp}} + \frac{amp}{K_{amp}} + 1} \right)^n + \left( \frac{pep}{K_{pep}} + 1 \right)^n \right) * (adp + K_{adp})}$                                                                                                                              | [11] |
| PDH      | $v_{PDH} = \frac{v_{max}^{PDH} * \left( \frac{1}{1 + K_{i_{nadh}}} \right) * \frac{pyr}{K_{pyr}} * \frac{nad}{K_{nad}} * \frac{coa}{K_{coa}}}{\left( 1 + \frac{pyr}{K_{pyr}} + \frac{glx}{K_{i_{glx}}} \right) * \left( 1 + \frac{nad}{K_{nad}} + \frac{nadh}{K_{nadh}} \right) * \left( 1 + \frac{coa}{K_{coa}} + \frac{accoa}{K_{accoa}} \right)}$                                                                 | [12] |

Table S3 ... continued: Kinetic Model Reaction Equations

| Reaction | Reaction Equation                                                                                                                                                                                                                                                                                                                                                                                                                                                                                                                                                                                                                                                                                                                                                                                                                                                                                                                                    |      |
|----------|------------------------------------------------------------------------------------------------------------------------------------------------------------------------------------------------------------------------------------------------------------------------------------------------------------------------------------------------------------------------------------------------------------------------------------------------------------------------------------------------------------------------------------------------------------------------------------------------------------------------------------------------------------------------------------------------------------------------------------------------------------------------------------------------------------------------------------------------------------------------------------------------------------------------------------------------------|------|
| PTAr     | $v_{PTAr} = \left( \frac{PTAr_{fwd}}{1 + \frac{K_{nadh}}{K_{nadh}^i} + \frac{atp}{K_{atp}^i}} * \frac{1 + \frac{v_{pep} * pep}{K_{pep}^i}}{1 + \frac{K_{pep}}{K_{pep}^i}} * \frac{1 + \frac{v_{pyr} * pyr}{K_{pyr}^i}}{1 + \frac{K_{pyr}}{K_{pyr}^i}} \right) -$ $\left( \frac{PTAr_{rev}}{1 + \frac{K_{nadh}}{K_{nadh}^i} + \frac{atp}{K_{atp}^i} + \frac{pep}{K_{pep}^i} + \frac{pyr}{K_{pyr}^i}} \right)$ $PTAr_{fwd} = \frac{v_{max}^f * \left( \frac{accoa}{K_{accoa}} \right) H_{accoa} * \frac{pi}{K_{pi}}}{1 + \left( \frac{accoa}{K_{accoa}} \right) H_{accoa} + \frac{pi}{K_{pi}} + \left( \left( \frac{accoa}{K_{accoa}} \right) H_{accoa} * \frac{pi}{K_{pi}} \right)}$ $PTAr_{rev} = \frac{v_{max}^r * \left( \frac{coa}{K_{coa}} \right) H_{coa} * \frac{actp}{K_{actp}}}{1 + \left( \frac{coa}{K_{coa}} \right) H_{coa} + \frac{actp}{K_{actp}} + \left( \left( \frac{coa}{K_{coa}} \right) H_{coa} * \frac{actp}{K_{actp}} \right)}$ | [13] |
| ACKr     | $v_{ACKr} = v_{ACKr}^{fwd} - v_{ACKr}^{rev}$ $v_{ACKr}^{fwd} = \frac{v_{max}^f * \frac{atp * ac}{\alpha * K_{atp} * K_{ac}}}{1 + \frac{atp}{K_{atp}} + \frac{ac}{K_{ac}} + \frac{actp}{K_{actp}} + \frac{atp * ac}{\alpha * K_{atp} * K_{ac}} + \frac{atp * actp}{K_{atp} * K_{actp}} + \frac{ac * actp}{K_{ac} * K_{actp}} + \frac{atp * ac * actp}{\alpha * K_{atp} * K_{ac} * K_{actp}}}$ $v_{ACKr}^{rev} = \frac{v_{max}^r * adp * actp}{K_{i adp} * K_{actp} + K_{adp} * actp + K_{actp} * adp + adp * actp}$                                                                                                                                                                                                                                                                                                                                                                                                                                   | [14] |
| ACS      | $v_{ACS} = 0$                                                                                                                                                                                                                                                                                                                                                                                                                                                                                                                                                                                                                                                                                                                                                                                                                                                                                                                                        | [15] |
| CS       | $v_{CS} = \frac{v_{max} * \left( 1 + \frac{K_{Hd1}}{H} + \frac{H}{K_{Hd2}} \right) * \frac{accoa}{K_{maccoa}} * \frac{ooa}{K_{mooa}}}{\left( \left( \frac{K_{daccoa}}{K_{maccoa}} + \frac{ooa}{K_{mooa}} \right) * Inh1 \right) + \left( \frac{accoa}{K_{maccoa}} * Inh2 \right) + \left( \frac{accoa}{K_{maccoa}} * \frac{ooa}{K_{mooa}} * Inh3 \right)}$ $Inh1 = 1 + \frac{K_{Hd1}}{H} + \left( \frac{H}{K_{Hd2}} * \left( 1 + \frac{atp}{K_{atp}^i} \right) \right)$ $Inh2 = 1 + \frac{K_{Hd1}}{H} + \frac{H}{K_{Hd2}} + \frac{akg}{K_{i1 akg}} + \frac{nadh}{K_{i1 nadh}}$ $Inh3 = 1 + \frac{K_{Hd1}}{H} + \frac{H}{K_{Hd2}} + \frac{akg}{K_{i2 akg}} + \frac{nadh}{K_{i2 nadh}}$ <p>Assuming fixed <math>pH = 7.0 \Rightarrow H = 10^{-1 * pH}</math></p>                                                                                                                                                                                       | [16] |
| ACONTa   | $v_{ACONTa} = v_{ACONTb}$                                                                                                                                                                                                                                                                                                                                                                                                                                                                                                                                                                                                                                                                                                                                                                                                                                                                                                                            | [17] |
| ACONTb   | $v_{ACONTb} = \left( \frac{v_{max}^{fwd} * cit^{n_f}}{K_{df}^{n_f} + cit^{n_f}} \right) - \left( \frac{v_{max}^{rev} * cit^{n_r}}{K_{dr}^{n_r} + cit^{n_r}} \right)$                                                                                                                                                                                                                                                                                                                                                                                                                                                                                                                                                                                                                                                                                                                                                                                 | [18] |
| ICDHyr   | $v_{ICDH} = \frac{v_{max}^{ICDH} * \frac{icit}{K_{micit}} * \frac{nadp}{K_{mnadp}}}{1 + \frac{nadp}{K_{mnadp}} + \frac{icit}{K_{micit}} * \frac{nadp}{K_{mnadp}}} * ICDH_{AllostInh}$ $ICDH_{AllostInh} = \frac{\left( 1 + \frac{icit}{K_{micit}} \right)^n}{L * \left( 1 + \frac{pep}{K_{ipep}} \right)^n + \left( 1 + \frac{icit}{K_{micit}} \right)^n}$                                                                                                                                                                                                                                                                                                                                                                                                                                                                                                                                                                                           | [19] |
| ICL      | $v_{ICL} = 0$                                                                                                                                                                                                                                                                                                                                                                                                                                                                                                                                                                                                                                                                                                                                                                                                                                                                                                                                        | [20] |
| AKGDH    | $v_{AKGDH} = \frac{v_{AKGDH}^{max} * akg * coa * nad * AKGDH_{Inhib}}{\left( K_{nad} * akg * coa \right) + \left( K_{coa} * akg * nad \right) + \left( K_{akg} * coa * nad \right) + \left( akg * coa * nad \right) +$ $\left( \frac{K_{akg} * K_z * succoa * nadh}{K_{isuccoa}} \right) + \left( \frac{K_{nad} * akg * coa * nadh}{K_{inadh}} \right) +$ $\left( \frac{K_{coa} * akg * nad * succoa}{K_{isuccoa}} \right) + \left( \frac{K_{akg} * K_z * ak * succoa * nadh}{K_{iakg} * K_{isuccoa}} \right)$ $AKGDH_{Inhib} = \frac{1}{1 + \frac{glx}{K_{igl x}}}$                                                                                                                                                                                                                                                                                                                                                                                 | [21] |

Table S3 ... continued: Kinetic Model Reaction Equations

| Reaction | Reaction Equation                                                                                                                                                                                                                                                                                                                                                                                                                                                                                                                                                                                                                                                                                                                                                                                                 |      |
|----------|-------------------------------------------------------------------------------------------------------------------------------------------------------------------------------------------------------------------------------------------------------------------------------------------------------------------------------------------------------------------------------------------------------------------------------------------------------------------------------------------------------------------------------------------------------------------------------------------------------------------------------------------------------------------------------------------------------------------------------------------------------------------------------------------------------------------|------|
| SUCOAS   | $v_{SUCOAS} = v_{SUCOAS}^{fwd} - v_{SUCOAS}^{rev}$ $v_{SUCOAS}^{fwd} = \frac{v_{max}^f * adp * succoa * pi}{(K_{adp} * K_{succoa} * K_{pi}) + (adp * K_{succoa} * K_{pi}) + (adp * succoa * K_{pi}) + (adp * K_{succoa} * pi) + (K_{adp} * succoa * pi) + (adp * succoa * pi)}$ $v_{SUCOAS}^{rev} = \frac{v_{max}^r * atp * coa * succ}{(K_{atp} * K_{coa} * K_{succ}) + (atp * K_{coa} * K_{succ}) + (atp * coa * K_{succ}) + (atp * K_{coa} * succ) + (K_{atp} * coa * succ) + (atp * coa * succ)}$                                                                                                                                                                                                                                                                                                             | [22] |
| SUCDi    | $v_{SUCDi} = \frac{v_{max}^{SD} * \frac{succ}{K_{succ}}}{1 + \frac{succ}{K_{succ}}}$                                                                                                                                                                                                                                                                                                                                                                                                                                                                                                                                                                                                                                                                                                                              | [23] |
| FUM      | $v_{FUM} = \frac{\left( \frac{v_{max}^{fwd} * f_{um}}{K_{f_{um}}} \right) - \left( \frac{v_{max}^{rev} * m_{al}}{K_{m_{al}}} \right)}{1 + \frac{m_{al}}{K_{m_{al}}} + \frac{f_{um}}{K_{f_{um}}}}$                                                                                                                                                                                                                                                                                                                                                                                                                                                                                                                                                                                                                 | [24] |
| MDH      | $v_{MDH} = \left( \frac{v_{MDH}^{fwd} * \frac{nad}{K_{nad}} * \frac{mal}{K_{mal}}}{1 + \frac{nad}{K_{nad}} + \frac{nad * mal}{K_{nad} * K_{mal}}} \right) - \left( \frac{v_{MDH}^{rev} * \frac{nadh}{K_{nadh}} * \frac{oa}{K_{oa}}}{1 + \frac{nadh}{K_{nadh}} + \frac{nadh * oa}{K_{nadh} * K_{oa}}} \right)$                                                                                                                                                                                                                                                                                                                                                                                                                                                                                                     | [25] |
| PPC      | $v_{PPC} = \left( \frac{v_{max}^{PPC} * pep^{n1}}{K_{pep}^{n1} + pep^{n1}} \right)$ $v_{max-app}^{PPC} = v_{max}^{PPC} * \left( \frac{\left( 1 + \frac{a * accoa}{K_a accoa} + \frac{b * fdp}{K_a fdp} + \frac{a * accoa * b * fdp * e}{K_a accoa * K_a fdp} \right)}{\left( 1 + \frac{a * accoa}{K_a accoa} + \frac{fdp}{K_a fdp} + \frac{a * accoa * fdp * e}{K_a accoa * K_a fdp} \right)} \right)$ $K_{m_{pep-app1}} = K_{m_{pep}} * \left( \frac{\left( 1 + \frac{a * accoa}{c * K_a accoa} + \frac{fdp}{d * K_a fdp} + \frac{a * accoa * fdp * e}{c * K_a accoa * d * K_a fdp} \right)}{\left( 1 + \frac{a * accoa}{K_a accoa} + \frac{fdp}{K_a fdp} + \frac{a * accoa * fdp * e}{K_a accoa * K_a fdp} \right)} \right)$ $K_{m_{pep-app2}} = K_{m_{pep-app1}} * \left( 1 + \frac{mal}{K_{i_{mal}}} \right)$ | [26] |
| PPCK     | $v_{PPCK} = \frac{v_{max}^{PPCK} * oa * atp}{(K_{i_{atp}} * K_{m_{oa}} * atp) + (K_{m_{atp}} * oa) + (oa * atp) + \left( \frac{K_{i_{atp}} * K_{m_{oa}} * pep}{K_{i_{pep}}} \right) + \left( \frac{K_{i_{atp}} * K_{m_{oa}} * adp}{K_{i_{adp}}} \right) + \left( \frac{K_{i_{atp}} * K_{m_{oa}} * atp * pep}{K_{i_{pep}} * K_{i_{atp}}} \right) + \left( \frac{K_{i_{atp}} * K_{m_{oa}} * oa * adp}{K_{i_{adp}} * K_{i_{oa}}} \right)}$                                                                                                                                                                                                                                                                                                                                                                           | [27] |
| ME1      | $v_{ME1} = Inh_{ME1} * \frac{v_{max}^{ME1} * nad * mal^{n1}}{(K_{i_{nad}} * K_{mal}^{n1}) + (K_{nad} * mal^{n1}) + (K_{mal}^{n1} * nad) + (nad * mal^{n1})}$ $Inh_{ME1} = \frac{\left( 1 + \frac{mal}{K_{mal}} \right)^{n2}}{L * \left( 1 + \frac{coa}{K_i} \right)^{n2} + \left( 1 + \frac{mal}{K_{mal}} \right)^{n2}}$                                                                                                                                                                                                                                                                                                                                                                                                                                                                                          | [28] |
| MALS     | $v_{MALS} = 0$                                                                                                                                                                                                                                                                                                                                                                                                                                                                                                                                                                                                                                                                                                                                                                                                    | [29] |
| G6PDH    | $v_{G6PDH} = \frac{v_{max}^{G6PDH} * nadp * g6p * NonCompInh_{g6pByNADPH} * NonCompInh_{byNADH}}{(K_{i_{nadp}} * K_{g6p} * CompInh_{nadpByNADPH}) + (K_{nadp} * CompInh_{nadpByNADPH} * g6p) + (nadp * K_{g6p}) + (nadp * g6p)}$ $NonCompInh_{byNADH} = \frac{1}{1 + \left( \frac{nadh}{K_{nadh}} \right)^n}$ $CompInh_{nadpByNADPH} = \left( 1 + \frac{nadph}{K_{i_{nadph}} - nadp} \right)$ $NonCompInh_{g6pByNADPH} = \frac{1}{1 + K_{i_{nadph-g6p}}}$                                                                                                                                                                                                                                                                                                                                                         | [30] |

Table S3 ... continued: Kinetic Model Reaction Equations

| Reaction | Reaction Equation                                                                                                                                                                                                                       |      |
|----------|-----------------------------------------------------------------------------------------------------------------------------------------------------------------------------------------------------------------------------------------|------|
| GND      | $v_{GND} = \frac{v_{max}^{GND} * 6pgc * nadp}{\left(6pgc + K_{6pgc} * \left(1 + \frac{fdp}{K_{ifdp}}\right) * \left(1 + \frac{atp}{K_{iatp}}\right)\right) * \left(nadp + K_{nadp} * \left(1 + \frac{nadph}{K_{inadph}}\right)\right)}$ | [31] |
| RPE      | $v_{RPE} = v_{max}^{RPE} * \left(ru5pD - \frac{xu5pD}{K_{eq}}\right)$                                                                                                                                                                   | [32] |
| RPI      | $v_{RPI} = v_{max}^{RPI} * \left(ru5pD - \frac{r5p}{K_{eq}}\right)$                                                                                                                                                                     | [33] |
| TKT1     | $v_{TKT1} = \frac{v_{max}^{TKT1} * \left(r5p * xu5pD - \frac{g3p * s7p}{K_{eq}}\right)}{\left(K_{r5p} * \left(1 + \frac{g3p}{K_{g3p}}\right) + r5p\right) * \left(K_{xu5pD} * \left(1 + \frac{s7p}{K_{s7p}}\right) + xu5pD\right)}$     | [34] |
| TKT2     | $v_{TKT2} = \frac{v_{max}^{TKT2} * \left(e4p * xu5pD - \frac{f6p * g3p}{K_{eq}}\right)}{\left(K_{e4p} * \left(1 + \frac{f6p}{K_{f6p}}\right) + e4p\right) * \left(K_{xu5pD} * \left(1 + \frac{g3p}{K_{g3p}}\right) + xu5pD\right)}$     | [35] |
| TALA     | $v_{TALA} = \frac{v_{TALA}^{fd} * \left(g3p * s7p - \frac{e4p * f6p}{K_{eq}}\right)}{\left(K_{g3p} * \left(1 + \frac{e4p}{K_{e4p}}\right) + g3p\right) * \left(K_{s7p} * \left(1 + \frac{f6p}{K_{f6p}}\right) + s7p\right)}$            | [36] |
