# Supplementary material for: Integrating Kinetic Model of E. coli with Genome Scale Metabolic Fluxes Overcomes Its Open System Problem and Reveals Bistability in Central Metabolism
Source: PubMed Central journal article supplement (PMC4607504; doi:10.1371/journal.pone.0139507), 2015-10-15
Supplement: pone.0139507.s009.pdf [file pone.0139507.s009.pdf]

# S4 Table: Table of Model Reaction Parameters

Table S4: Kinetic Model Reaction Parameters

| Reaction | Reaction Parameters      |                  | Experimental Conditions |            | Value Status        | Reference                                                                                                                                                                                                                                                                                                                                                  |
|----------|--------------------------|------------------|-------------------------|------------|---------------------|------------------------------------------------------------------------------------------------------------------------------------------------------------------------------------------------------------------------------------------------------------------------------------------------------------------------------------------------------------|
|          | Parameter                | Value            | pH                      | Temp. (°C) |                     |                                                                                                                                                                                                                                                                                                                                                            |
| PTS      | K <sub>a1</sub>          | 1.0 * 0.5097     | Unknown                 | Unknown    | Estimated           | Estimated <sup>1</sup><br>Notley-McRobb (1997) <sup>1</sup><br>Estimated <sup>1</sup><br>Kaback (1969) <sup>1</sup><br>Estimated <sup>1</sup>                                                                                                                                                                                                              |
|          | K <sub>a2</sub>          | 0.01 * 1.4791    | 7                       | 37         | Taken               |                                                                                                                                                                                                                                                                                                                                                            |
|          | K <sub>a3</sub>          | 1.0 * 0.8550     | Unknown                 | Unknown    | Estimated           |                                                                                                                                                                                                                                                                                                                                                            |
|          | K <sub>g6p</sub>         | 0.5 * 0.5158     | 6.6                     | Unknown    | Taken               |                                                                                                                                                                                                                                                                                                                                                            |
|          | N                        | 4 * 0.5644       | Unknown                 | Unknown    | Estimated           |                                                                                                                                                                                                                                                                                                                                                            |
| PGMT     | K <sub>eq</sub>          | 0.142 * 1.0478   | 7.4                     | 25         | Taken               | Lawry, Passonneau (1969) <sup>1</sup><br>Lawry, Passonneau (1969) <sup>1</sup><br>Lawry, Passonneau (1969) <sup>1</sup><br>Duckworth (1973) <sup>1</sup><br>Duckworth (1973) <sup>1</sup><br>Duckworth (1973) <sup>1</sup>                                                                                                                                 |
|          | K <sub>g6p</sub>         | 0.02 * 0.8489    | 7.4                     | 25         | Taken               |                                                                                                                                                                                                                                                                                                                                                            |
|          | K <sub>g1p</sub>         | 0.008 * 0.9104   | 7.4                     | 25         | Taken               |                                                                                                                                                                                                                                                                                                                                                            |
|          | Ki <sub>accoa</sub>      | 0.0917 * 1.1575  | 7.4                     | 25         | Calculated          |                                                                                                                                                                                                                                                                                                                                                            |
|          | Ki <sub>succoa</sub>     | 0.1494 * 1.4585  | 7.4                     | 25         | Calculated          |                                                                                                                                                                                                                                                                                                                                                            |
|          | Ki <sub>coa</sub>        | 0.1025 * 1.0296  | 7.4                     | 25         | Calculated          |                                                                                                                                                                                                                                                                                                                                                            |
| PGI      | Specific Activity        | 212.6            | 7.4                     | 22         | Taken               | BRENDA<br>Takama and Nosoh (1980)<br>Dykhuzen and Hartl (1983)<br>Pettersson (1990)<br>Schreyer and Bock (1980)<br>Schreyer and Bock (1980)                                                                                                                                                                                                                |
|          | K <sub>g6p</sub>         | 2.46             | 8                       | 65         | Taken               |                                                                                                                                                                                                                                                                                                                                                            |
|          | K <sub>f6p</sub>         | 0.2              | 7.65                    | 37         | Taken               |                                                                                                                                                                                                                                                                                                                                                            |
|          | K <sub>eq</sub>          | 0.43             | 7                       | Unknown    | Taken               |                                                                                                                                                                                                                                                                                                                                                            |
|          | K <sub>6pginh_g6p</sub>  | 0.19             | 8                       | 28         | Taken               |                                                                                                                                                                                                                                                                                                                                                            |
|          | Ki <sub>6pginh_f6p</sub> | 0.19             | 8                       | 28         | Taken               |                                                                                                                                                                                                                                                                                                                                                            |
| PFK      | K <sub>pep</sub>         | 3.26 * 0.6670    | Unknown                 | Unknown    | Estimated           | Estimated <sup>1</sup><br>Rizzi (1997) <sup>1</sup><br>Rizzi (1997) <sup>1</sup><br>Rizzi (1997) <sup>1</sup><br>Rizzi (1997) <sup>1</sup><br>Rizzi (1997) <sup>1</sup><br>Deville-Bonne (1991) <sup>1</sup><br>Deville-Bonne (1991) <sup>1</sup><br>Deville-Bonne (1991) <sup>1</sup><br>Diaz Ricci (1999) <sup>1</sup><br>Diaz Ricci (1999) <sup>1</sup> |
|          | K <sub>adp_b</sub>       | 0.25 * 0.8933    | Unknown                 | Unknown    | Taken               |                                                                                                                                                                                                                                                                                                                                                            |
|          | K <sub>amp_b</sub>       | 0.1 * 0.9036     | Unknown                 | Unknown    | Taken               |                                                                                                                                                                                                                                                                                                                                                            |
|          | K <sub>adp_a</sub>       | 239 * 1.2577     | Unknown                 | Unknown    | Taken               |                                                                                                                                                                                                                                                                                                                                                            |
|          | K <sub>amp_a</sub>       | 8.74 * 1.4871    | Unknown                 | Unknown    | Taken               |                                                                                                                                                                                                                                                                                                                                                            |
|          | K <sub>atp_s</sub>       | 0.16 * 1.2429    | 8.2                     | 28         | Taken               |                                                                                                                                                                                                                                                                                                                                                            |
|          | K <sub>adp_c</sub>       | 0.36 * 1.4444    | 8.2                     | 28         | Taken               |                                                                                                                                                                                                                                                                                                                                                            |
|          | K <sub>f6p_s</sub>       | 0.14 * 1.5189    | 8.2                     | 28         | Taken               |                                                                                                                                                                                                                                                                                                                                                            |
|          | L                        | 4000000 * 1.5322 | Unknown                 | Unknown    | Taken               |                                                                                                                                                                                                                                                                                                                                                            |
|          | n                        | 4 * 0.6372       | Unknown                 | Unknown    | Taken               |                                                                                                                                                                                                                                                                                                                                                            |
| FBA      | k <sub>cat</sub>         | 10.5             | Unknown                 | 30         | Taken               | BRENDA<br>Babul (1993) <sup>2</sup><br>Babul (1993) <sup>2</sup>                                                                                                             |
|          | K <sub>fdp</sub>         | 0.133 * 1.7525   | 7.6                     | 30         | Taken               |                                                                                                                                                                                                                                                                                                                                                            |
|          | K <sub>g3p</sub>         | 0.088 * 1.9036   | 7.6                     | 30         | Taken               |                                                                                                                                                                                                                                                                                                                                                            |
|          | K <sub>dhap</sub>        | 0.088 * 1.4949   | 7.6                     | 30         | Taken               |                                                                                                                                                                                                                                                                                                                                                            |
|          | K <sub>inh_g3p</sub>     | 0.6 * 1.3178     | 7.6                     | 30         | Taken               |                                                                                                                                                                                                                                                                                                                                                            |
|          | K <sub>eq</sub>          | 0.14 * 0.5       | 7.6                     | 30         | Taken               |                                                                                                                                                                                                                                                                                                                                                            |
|          | V <sub>blf</sub>         | 2 * 0.5          | 7.6                     | 30         | Taken               |                                                                                                                                                                                                                                                                                                                                                            |
|          |                          |                  |                         |            |                     |                                                                                                                                                                                                                                                                                                                                                            |
| TPI      | k <sub>cat</sub>         | 9000             | Unknown                 | 30         | Taken               | BRENDA<br>Babul (1993)<br>Babul (1993)<br>Babul (1993)<br>Babul (1993)                                                                                                                                                                                                                                                                                     |
|          | K <sub>eq</sub>          | 0.04 * 1.6902    | 7.6                     | 30         | Taken               |                                                                                                                                                                                                                                                                                                                                                            |
|          | K <sub>dhap</sub>        | 2.8 * 1.2219     | 7.6                     | 30         | Taken               |                                                                                                                                                                                                                                                                                                                                                            |
|          | K <sub>g3p</sub>         | 0.3 * 1.9113     | 7.6                     | 30         | Taken               |                                                                                                                                                                                                                                                                                                                                                            |
|          |                          |                  |                         |            |                     |                                                                                                                                                                                                                                                                                                                                                            |
| GAPDH    | k <sub>cat</sub>         | 268              | 7.3                     | 22         | Taken               | Eyschen (1999)<br>Pettersson (1990) <sup>2</sup><br>Bakker (1997) <sup>2</sup><br>Bakker (1997) <sup>2</sup><br>Bakker (1997) <sup>2</sup><br>Bakker (1997) <sup>2</sup>                                                                                                                                                                                   |
|          | K <sub>eq</sub>          | 0.63 * 1.7642    | 7                       | Unknown    | Taken               |                                                                                                                                                                                                                                                                                                                                                            |
|          | K <sub>g3p</sub>         | 0.15 * 0.8375    | Unknown                 | 25         | Taken               |                                                                                                                                                                                                                                                                                                                                                            |
|          | K <sub>pgp</sub>         | 0.1 * 0.5292     | Unknown                 | 25         | Taken               |                                                                                                                                                                                                                                                                                                                                                            |
|          | K <sub>nad</sub>         | 0.45 * 1.9370    | Unknown                 | 25         | Taken               |                                                                                                                                                                                                                                                                                                                                                            |
|          | K <sub>nadh</sub>        | 0.02 * 0.8014    | Unknown                 | 25         | Taken               |                                                                                                                                                                                                                                                                                                                                                            |
| PGK      | Specific Activity        | 480              | 8.2                     | Unknown    | Taken               | Fifis (1978)<br>Ni and Savageau (1996) <sup>2</sup><br>Molnar and Vas (1993) <sup>2</sup><br>Fifis and Scopes (1978) <sup>2</sup><br>Lavoinne (1983) <sup>2</sup><br>Schmidt (1995) <sup>2</sup>                                                                                                                                                           |
|          | K <sub>eq</sub>          | 1800 * 0.7628    | Unknown                 | Unknown    | Taken (Erythrocyte) |                                                                                                                                                                                                                                                                                                                                                            |
|          | K <sub>adp</sub>         | 0.18 * 1.0170    | 7.5                     | 20         | Taken               |                                                                                                                                                                                                                                                                                                                                                            |
|          | K <sub>atp</sub>         | 0.24 * 0.6045    | 7                       | 37         | Taken               |                                                                                                                                                                                                                                                                                                                                                            |
|          | K <sub>13dpg</sub>       | 0.006 * 1.9082   | Unknown                 | Unknown    | Taken (Rat Liver)   |                                                                                                                                                                                                                                                                                                                                                            |
|          | K <sub>3pg</sub>         | 0.17 * 1.8192    | Unknown                 | Unknown    | Taken (Yeast)       |                                                                                                                                                                                                                                                                                                                                                            |
| PGM      | v <sub>PGM_maxr</sub>    | 33.6089          |                         |            | Estimated           | Estimated<br>Fraser (1999)<br>Fraser (1999)                                                                                                                                                                                                                                                                                                                |
|          | K <sub>3pg</sub>         | 0.2              | 7                       | 37         | Taken               |                                                                                                                                                                                                                                                                                                                                                            |
|          | K <sub>2pg</sub>         | 0.19             | 7                       | 37         | Taken               |                                                                                                                                                                                                                                                                                                                                                            |
| ENO      | Specific Activity        | 180              | 8.1                     | 30         | Taken               | Spring (1971)<br>Spring and Wold (1971)<br>Spring and Wold (1971)<br>Duggleby (1994)                                                                                                                                                                                                                                                                       |
|          | K <sub>eq</sub>          | 6.7              | 8.1                     | 30         | Taken               |                                                                                                                                                                                                                                                                                                                                                            |
|          | K <sub>2pg</sub>         | 0.1              | 8.1                     | 30         | Taken               |                                                                                                                                                                                                                                                                                                                                                            |
|          | K <sub>pep</sub>         | 0.135            | Unknown                 | Unknown    | Taken               |                                                                                                                                                                                                                                                                                                                                                            |
| PYK      | K <sub>pep</sub>         | 0.31 * 1.5800    | 7                       | 25         | Taken               | Bioteax (1983) <sup>1</sup><br>Bioteax (1983) <sup>1</sup><br>Bioteax (1983) <sup>1</sup><br>Bioteax (1983) <sup>1</sup><br>Bioteax (1983) <sup>1</sup><br>Bioteax (1983) <sup>1</sup><br>Bioteax (1983) <sup>1</sup>                                                                                                                                      |
|          | n                        | 4 * 0.8465       | 7                       | 25         | Taken               |                                                                                                                                                                                                                                                                                                                                                            |
|          | L                        | 1000 * 0.9705    | 7                       | 25         | Taken               |                                                                                                                                                                                                                                                                                                                                                            |
|          | K <sub>atp</sub>         | 22.5 * 1.2049    | 7                       | 25         | Taken               |                                                                                                                                                                                                                                                                                                                                                            |
|          | K <sub>fdp</sub>         | 0.19 * 0.5306    | 7                       | 25         | Taken               |                                                                                                                                                                                                                                                                                                                                                            |
|          | K <sub>amp</sub>         | 0.2 * 2.2524     | 7                       | 25         | Taken               |                                                                                                                                                                                                                                                                                                                                                            |
|          | K <sub>adp</sub>         | 0.26 * 0.5167    | 7                       | 25         | Taken               |                                                                                                                                                                                                                                                                                                                                                            |

[1] Minimum adjustment needed to respective kinetic parameters which would ensure a stable steady state of the system. Found via optimization, discussed in the methods section.

[2] Minimum adjustment made to respective kinetic parameters. The constant adjustment factor was found from the optimization routine (as discussed in the methods section) implemented to find the missing intracellular metabolite concentrations.

Table S4 ... continued: Kinetic Model Reaction Parameters

| Reaction          | Reaction Parameters       |                 | Experimental Conditions |            | Value Status                        | Reference                           |
|-------------------|---------------------------|-----------------|-------------------------|------------|-------------------------------------|-------------------------------------|
|                   | Parameter                 | Value           | pH                      | Temp. (°C) |                                     |                                     |
| PDH               | Specific Activity         | 28.5            | Unknown                 | Unknown    | Taken                               | BRENDA                              |
|                   | Ki                        | 46.4 * 1.5155   | 6.5                     | 30         | Taken ( <i>L.lactis</i> )           | Hoefnagel (2002) <sup>2</sup>       |
|                   | K <sub>pyr</sub>          | 0.3 * 1.6721    | 7.6                     | 25         | Taken                               | Bisswanger (1981) <sup>2</sup>      |
|                   | K <sub>nad</sub>          | 0.4 * 1.8722    | 6                       | 37         | Taken ( <i>L.lactis</i> )           | Snoep (1992) <sup>2</sup>           |
|                   | K <sub>coa</sub>          | 0.014 * 1.2495  | 6.5                     | 30         | Taken ( <i>L.lactis</i> )           | Hoefnagel (2002) <sup>2</sup>       |
|                   | K <sub>nadh</sub>         | 0.1 * 1.7999    | 6.5                     | 30         | Taken ( <i>L.lactis</i> )           | Hoefnagel (2002) <sup>2</sup>       |
|                   | K <sub>accoa</sub>        | 0.008 * 1.3667  | 7.6                     | 25         | Taken ( <i>A.vinelandii</i> )       | Bresters (1975) <sup>2</sup>        |
|                   | Ki <sub>glx</sub>         | 0.5 * 1.3688    | 7.6                     | 25         | Taken                               | Bisswanger (1981) <sup>2</sup>      |
| PTAr              | Enzyme Conc.              | 0.7207 mg/gDCW  | 8                       | 30         | Taken                               | Ishii (2007)                        |
|                   | Enzyme Weight             | 463.032 g/mmol  | 8                       | 30         | Taken                               | EcoCyc                              |
|                   | K <sub>accoa</sub>        | 0.0449 * 1.4584 | 8                       | 30         | Taken                               | Campos-Bermudez (2010) <sup>2</sup> |
|                   | K <sub>pi</sub>           | 2.1 * 0.7918    | 8                       | 30         | Taken                               | Campos-Bermudez (2010) <sup>2</sup> |
|                   | H <sub>accoa</sub>        | 1.3 * 1.6313    | 8                       | 30         | Taken                               | Campos-Bermudez (2010) <sup>2</sup> |
|                   | Ki <sub>nadh_f</sub>      | 0.0696 * 1.7572 | 8                       | 30         | Calculated                          | Campos-Bermudez (2010) <sup>2</sup> |
|                   | Ki <sub>atp_f</sub>       | 0.2667 * 1.7697 | 8                       | 30         | Calculated                          | Campos-Bermudez (2010) <sup>2</sup> |
|                   | Ka <sub>pep</sub>         | 0.0479 * 1.2347 | 8                       | 30         | Calculated                          | Campos-Bermudez (2010) <sup>2</sup> |
|                   | Ka <sub>pyr</sub>         | 1.0642 * 1.3458 | 8                       | 30         | Calculated                          | Campos-Bermudez (2010) <sup>2</sup> |
|                   | v <sub>pep</sub>          | 1.2051 * 1.7360 | 8                       | 30         | Calculated                          | Campos-Bermudez (2010) <sup>2</sup> |
|                   | v <sub>pyr</sub>          | 1.3965 * 1.8486 | 8                       | 30         | Calculated                          | Campos-Bermudez (2010) <sup>2</sup> |
|                   | kcat <sub>rev</sub>       | 227.6 * 33.6638 | 8                       | 30         | Taken                               | Campos-Bermudez (2010) <sup>2</sup> |
|                   | K <sub>coa</sub>          | 0.0672 * 1.0468 | 8                       | 30         | Taken                               | Campos-Bermudez (2010) <sup>2</sup> |
|                   | K <sub>actp</sub>         | 0.9 * 1.5456    | 8                       | 30         | Taken                               | Campos-Bermudez (2010) <sup>2</sup> |
|                   | H <sub>coa</sub>          | 1.7 * 0.5666    | 8                       | 30         | Taken                               | Campos-Bermudez (2010) <sup>2</sup> |
|                   | Ki <sub>nadh</sub>        | 0.1091 * 1.5116 | 8                       | 30         | Calculated                          | Campos-Bermudez (2010) <sup>2</sup> |
|                   | Ki <sub>atp</sub>         | 0.239 * 1.3285  | 8                       | 30         | Calculated                          | Campos-Bermudez (2010) <sup>2</sup> |
| Ki <sub>pep</sub> | 2.5333 * 1.8283           | 8               | 30                      | Calculated | Campos-Bermudez (2010) <sup>2</sup> |                                     |
| Ki <sub>pyr</sub> | 36.7241 * 1.0574          | 8               | 30                      | Calculated | Campos-Bermudez (2010) <sup>2</sup> |                                     |
| ACKr              | Enzyme Conc.              | 0.9666 mg/gDCW  | 8                       | 30         | Taken                               | Ishii (2007)                        |
|                   | SpecActivity <sub>f</sub> | 2000 * 11.5280  | 7.4                     | 21         | Taken                               | Fox (1985) <sup>2</sup>             |
|                   | alpha                     | 2/35 * 0.5605   | 7                       | 25         | Calculated                          | Janson (1974) <sup>2</sup>          |
|                   | K <sub>atp</sub>          | 0.35 * 1.0332   | 7                       | 25         | Calculated                          | Janson (1974) <sup>2</sup>          |
|                   | K <sub>ac</sub>           | 101.5 * 0.7185  | 7                       | 25         | Calculated                          | Janson (1974) <sup>2</sup>          |
|                   | Ki <sub>actp</sub>        | 0.715 * 1.8123  | 7                       | 25         | Calculated                          | Janson (1974) <sup>2</sup>          |
|                   | SpecActivity <sub>r</sub> | 2600            | 7.4                     | 21         | Taken                               | Fox (1985)                          |
|                   | Ki <sub>adp</sub>         | 0.05 * 0.6447   | 7                       | 25         | Taken                               | Janson (1974) <sup>2</sup>          |
|                   | K <sub>actp</sub>         | 0.34 * 1.4746   | 7                       | 25         | Taken                               | Janson (1974) <sup>2</sup>          |
|                   | K <sub>adp</sub>          | 0.36 * 1.0877   | 7                       | 25         | Taken                               | Janson (1974) <sup>2</sup>          |
| CS                | kcat                      | 81              | Unknown                 | Unknown    | Taken                               | BRENDA                              |
|                   | K <sub>Hd1</sub>          | 1e-5 * 1.1188   | 7                       | Unknown    | Taken                               | Mogilevskaya (2009) <sup>2</sup>    |
|                   | K <sub>Hd2</sub>          | 2e-4 * 1.0097   | 7                       | Unknown    | Taken                               | Mogilevskaya (2009) <sup>2</sup>    |
|                   | K <sub>daccoa</sub>       | 0.1 * 1.1475    | 7                       | Unknown    | Taken                               | Mogilevskaya (2009) <sup>2</sup>    |
|                   | K <sub>moaa</sub>         | 0.04 * 0.9656   | 7                       | Unknown    | Taken                               | Mogilevskaya (2009) <sup>2</sup>    |
|                   | K <sub>maccoa</sub>       | 0.18 * 1.6688   | 7                       | Unknown    | Taken                               | Mogilevskaya (2009) <sup>2</sup>    |
|                   | K <sub>iatp</sub>         | 0.58 * 0.9938   | 7                       | Unknown    | Taken                               | Mogilevskaya (2009) <sup>2</sup>    |
|                   | K <sub>i1akg</sub>        | 0.015 * 0.9859  | 7                       | Unknown    | Taken                               | Mogilevskaya (2009) <sup>2</sup>    |
|                   | K <sub>i1nadh</sub>       | 3.3e-4 * 1.1324 | 7                       | Unknown    | Taken                               | Mogilevskaya (2009) <sup>2</sup>    |
|                   | K <sub>i2akg</sub>        | 0.256 * 0.9926  | 7                       | Unknown    | Taken                               | Mogilevskaya (2009) <sup>2</sup>    |
|                   | K <sub>i2nadh</sub>       | 8.4e-3 * 1.0013 | 7                       | Unknown    | Taken                               | Mogilevskaya (2009) <sup>2</sup>    |
| ACONTb            | SpecActivity <sub>f</sub> | 10.71           | 7.5                     | Unknown    | Taken                               | Tsuchiya (2009)                     |
|                   | SpecActivity <sub>r</sub> | 3.628           | 7.5                     | Unknown    | Taken                               | Tsuchiya (2009)                     |
|                   | n <sub>f</sub>            | 1.229           | 7.5                     | Unknown    | Taken                               | Tsuchiya (2009)                     |
|                   | K <sub>df</sub>           | 11.1            | 7.5                     | Unknown    | Taken                               | Tsuchiya (2009)                     |
|                   | n <sub>r</sub>            | 0.727           | 7.5                     | Unknown    | Taken                               | Tsuchiya (2009)                     |
|                   | K <sub>dr</sub>           | 0.741           | 7.5                     | Unknown    | Taken                               | Tsuchiya (2009)                     |
| ICDHyr            | Specific Activity         | 54.8294         | 7.1                     | Unknown    | Calculated                          | Ogawa (2007)                        |
|                   | Km <sub>icit</sub>        | 0.029           | 7.1                     | Unknown    | Taken                               | Ogawa (2007)                        |
|                   | Ki <sub>pep</sub>         | 0.31            | 7.1                     | Unknown    | Taken                               | Ogawa (2007)                        |
|                   | Km <sub>nadp</sub>        | 0.005           | 7.1                     | Unknown    | Calculated                          | Ogawa (2007)                        |
|                   | L                         | 0.3709          | 7.1                     | Unknown    | Calculated                          | Ogawa (2007)                        |
|                   | N                         | 1.0048          | 7.1                     | Unknown    | Calculated                          | Ogawa (2007)                        |
| AKGDH             | k <sub>cat</sub>          | 49              | Unknown                 | Unknown    | Taken ( <i>E.coli</i> )             | Waskiewicz (1984)                   |
|                   | K <sub>nad</sub>          | 0.07 * 0.8378   | Unknown                 | Unknown    | Taken ( <i>D.discoideum</i> )       | Wright (1992) <sup>2</sup>          |
|                   | K <sub>coa</sub>          | 0.002 * 1.8842  | Unknown                 | Unknown    | Taken ( <i>D.discoideum</i> )       | Wright (1992) <sup>2</sup>          |
|                   | K <sub>akg</sub>          | 0.1 * 0.9096    | 8                       | 25         | Taken                               | Gupta (1980) <sup>2</sup>           |
|                   | K <sub>z</sub>            | 1.5 * 0.8534    | Unknown                 | Unknown    | Taken ( <i>D.discoideum</i> )       | Wright (1992) <sup>2</sup>          |
|                   | Ki <sub>succoa</sub>      | 0.004 * 1.2453  | Unknown                 | Unknown    | Taken ( <i>D.discoideum</i> )       | Wright (1992) <sup>2</sup>          |
|                   | Ki <sub>nadh</sub>        | 0.018 * 1.7608  | Unknown                 | Unknown    | Taken ( <i>D.discoideum</i> )       | Wright (1992) <sup>2</sup>          |
|                   | Ki <sub>akg</sub>         | 0.75 * 1.5148   | Unknown                 | Unknown    | Taken ( <i>D.discoideum</i> )       | Wright (1992) <sup>2</sup>          |
|                   | Ki <sub>glx</sub>         | 1.7 * 1.5554    | 8                       | 25         | Taken                               | Gupta (1980) <sup>2</sup>           |

[1] Minimum adjustment needed to respective kinetic parameters which would ensure a stable steady state of the system.

Found via optimization, discussed in the methods section.

[2] Minimum adjustment made to respective kinetic parameters. The constant adjustment factor was found from the optimization routine (as discussed in the methods section) implemented to find the missing intracellular metabolite concentrations.

Table S4 ... continued: Kinetic Model Reaction Parameters

| Reaction          | Reaction Parameters       |                  | Experimental Conditions |            | Value Status       | Reference                         |
|-------------------|---------------------------|------------------|-------------------------|------------|--------------------|-----------------------------------|
|                   | Parameter                 | Value            | pH                      | Temp. (°C) |                    |                                   |
| SUCOAS            | Enzyme Conc.              | 3.5296           | 7                       | 30         | Taken              | Ishii (2007)                      |
|                   | Enzyme Weight             | 142.34           | Unknown                 | Unknown    | Taken              | EcoCyc                            |
|                   | K <sub>adp</sub>          | 0.012 * 0.9361   | Unknown                 | Unknown    | Taken              | Boyer (The Enzymes V.10)          |
|                   | K <sub>succoa</sub>       | 0.0077 * 1.3790  | Unknown                 | Unknown    | Taken              | Boyer (The Enzymes V.10)          |
|                   | K <sub>pi</sub>           | 2.6 * 1.7161     | Unknown                 | Unknown    | Taken              | Boyer (The Enzymes V.10)          |
|                   | kcat <sub>r</sub>         | 44.73 * 0.8294   | Unknown                 | Unknown    | Taken              | BRENDA                            |
|                   | K <sub>atp</sub>          | 0.02 * 1.0388    | 7.2                     | 25         | Taken              | Moffet (1970)                     |
|                   | K <sub>coa</sub>          | 0.0015 * 1.0351  | 7.2                     | 25         | Taken              | Moffet (1970)                     |
| K <sub>succ</sub> | 0.1 * 1.6713              | 7.2              | 25                      | Taken      | Moffet (1970)      |                                   |
| SUCDi             | K <sub>succ</sub>         | 0.26 * 0.8556    | 7.7                     | 30         | Taken              | Hirsch (1963) <sup>1</sup>        |
| FUM               | SpecActivity <sub>r</sub> | 340              | 8                       | 30         | Taken              | Ueda (1990)                       |
|                   | Enzyme Conc.              | 1.7678           | 7                       | 30         | Taken              | Ishii (2007)                      |
|                   | K <sub>fum</sub>          | 0.39 * 1.5333    | Unknown                 | Unknown    | Taken              | BRENDA, Woods (1988) <sup>1</sup> |
|                   | K <sub>mal</sub>          | 2.94 * 1.0252    | Unknown                 | Unknown    | Taken              | BRENDA, Woods (1988) <sup>1</sup> |
| MDH               | Enzyme Conc.              | 0.7724 mg/gDCW   | 8                       | 30         | Taken              | Ishii (2007)                      |
|                   | Enzyme Weight             | 64.674 g/mmol    | Unknown                 | Unknown    | Taken              | EcoCyc                            |
|                   | kcat <sub>malform</sub>   | 900 * 0.6989     | 7.5                     | 25         | Taken              | Muslin (1995) <sup>2</sup>        |
|                   | Km <sub>nad</sub>         | 0.26 * 0.8351    | 7.5                     | 25         | Taken              | Muslin (1995) <sup>2</sup>        |
|                   | Km <sub>mal</sub>         | 2.6 * 0.7938     | 7.5                     | 25         | Taken              | Muslin (1995) <sup>2</sup>        |
|                   | Km <sub>nadh</sub>        | 0.061 * 1.8867   | 7.5                     | 25         | Taken              | Muslin (1995) <sup>2</sup>        |
|                   | Km <sub>oaa</sub>         | 0.049 * 1.9522   | 7.5                     | 25         | Taken              | Muslin (1995) <sup>2</sup>        |
| PPC               | a                         | 8.2              | 7.3                     | 30         | Calculated (Fig.1) | Izui (1981)                       |
|                   | b                         | 4.5014           | 7.3                     | 30         | Calculated (Fig.1) | Izui (1981)                       |
|                   | c                         | 12.9             | 7.3                     | 30         | Calculated (Fig.1) | Izui (1981)                       |
|                   | d                         | 8.0988           | 7.3                     | 30         | Calculated (Fig.1) | Izui (1981)                       |
|                   | e                         | 0.5731           | 7.3                     | 30         | Calculated (Fig.1) | Izui (1981)                       |
|                   | Km <sub>pep</sub>         | 15               | 7.3                     | 30         | Taken              | Izui (1981)                       |
|                   | n1                        | 1.2              | 7.3                     | 30         | Taken              | Izui (1981)                       |
|                   | Ka <sub>accoa</sub>       | 0.001            | 7.3                     | 30         | Calculated (Fig.1) | Izui (1981)                       |
|                   | Ka <sub>fdp</sub>         | 2.4540           | 7.3                     | 30         | Calculated (Fig.1) | Izui (1981)                       |
|                   | Ki <sub>mal</sub>         | 2.2              | 8.5                     | 30         | Taken              | Izui (1983)                       |
| PPCK              | Specific Activity         | 32.3333          | 7                       | 37         | Taken              | Yang (2003)                       |
|                   | Ki <sub>atp</sub>         | 0.04             | 7                       | 37         | Taken              | Yang (2003)                       |
|                   | Km <sub>oaa</sub>         | 0.67             | 7                       | 37         | Taken              | Yang (2003)                       |
|                   | Km <sub>atp</sub>         | 0.06             | 7                       | 37         | Taken              | Yang (2003)                       |
|                   | Ki <sub>pep</sub>         | 0.06             | 7                       | 37         | Taken              | Yang (2003)                       |
|                   | Ki <sub>adp</sub>         | 0.04             | 7                       | 37         | Taken              | Yang (2003)                       |
|                   | Km <sub>pep</sub>         | 0.07             | 7                       | 37         | Taken              | Yang (2003)                       |
|                   | KI <sub>atp</sub>         | 0.04             | 7                       | 37         | Taken              | Yang (2003)                       |
|                   | KI <sub>oaa</sub>         | 0.45             | 7                       | 37         | Taken              | Yang (2003)                       |
| ME1               | n1                        | 1.3              | 7.2                     | 25         | Taken              | Yamaguchi (1974)                  |
|                   | Ki <sub>nad</sub>         | 0.3317           | 7.2                     | 25         | Calculated (Fig6)  | Wang (2006)                       |
|                   | K <sub>nad</sub>          | 0.097            | 7.2                     | 25         | Taken              | Wang (2006)                       |
|                   | K <sub>mal</sub>          | 0.420            | 7.2                     | 25         | Taken              | Wang (2006)                       |
|                   | n2                        | 1.1974           | 7.9                     | 30         | Calculated (Fig8)  | Yamaguchi (1974)                  |
|                   | L                         | 0.14899          | 7.9                     | 30         | Calculated (Fig8)  | Yamaguchi (1974)                  |
|                   | Ki                        | 0.016205         | 7.9                     | 30         | Calculated (Fig8)  | Yamaguchi (1974)                  |
| G6PDH             | Specific Activity         | 5.7              | 8.0                     | Unknown    | Taken              | Sanwal (1970)                     |
|                   | Ki <sub>nadh</sub>        | 0.22081 * 1.5693 | 7.5                     | Unknown    | Calculated (Fig7)  | Sanwal (1970) <sup>2</sup>        |
|                   | n                         | 1.7847 * 1.9514  | 7.5                     | Unknown    | Calculated (Fig7)  | Sanwal (1970) <sup>2</sup>        |
|                   | Ki <sub>nadph_nadp</sub>  | 0.01 * 1.9529    | 7.5                     | Unknown    | Taken              | Sanwal (1970) <sup>2</sup>        |
|                   | Ki <sub>nadph_g6p</sub>   | 0.69684 * 1.9993 | 7.5                     | Unknown    | Calculated (Fig7)  | Sanwal (1970) <sup>2</sup>        |
|                   | Ki <sub>nadp</sub>        | 0.07 * 0.5110    | 7.5                     | Unknown    | Taken              | Sanwal (1970) <sup>2</sup>        |
|                   | K <sub>g6p</sub>          | 0.07 * 0.5022    | 7.5                     | Unknown    | Taken              | Sanwal (1970) <sup>2</sup>        |
|                   | K <sub>nadp</sub>         | 0.015 * 0.5016   | 7.5                     | Unknown    | Taken              | Sanwal (1970) <sup>2</sup>        |
| GND               | Specific Activity         | 32               | Unknown                 | Unknown    | Taken              | BRENDA                            |
|                   | K <sub>6pgc</sub>         | 0.1              | 7.5                     | 25         | Taken              | DeSilva (1979)                    |
|                   | Ki <sub>fdp</sub>         | 0.025            | 7.5                     | 25         | Taken              | DeSilva (1979)                    |
|                   | K <sub>nadp</sub>         | 0.028            | 7.5                     | 25         | Taken              | DeSilva (1979)                    |
|                   | Ki <sub>nadph</sub>       | 0.01             | 7.5                     | 25         | Taken              | DeSilva (1979)                    |
| Ki <sub>atp</sub> | 3                         | 7.5              | 25                      | Taken      | DeSilva (1979)     |                                   |
| RPE               | K <sub>eq</sub>           | 1.4              | 5                       | 30         | Taken (Yeast)      | Chassagnole (2002)                |
| RPI               | K <sub>eq</sub>           | 4                | 5                       | 30         | Taken (Yeast)      | Chassagnole (2002)                |

[1] Minimum adjustment needed to respective kinetic parameters which would ensure a stable steady state of the system.

Found via optimization, discussed in the methods section.

[2] Minimum adjustment made to respective kinetic parameters. The constant adjustment factor was found from the optimization routine (as discussed in the methods section) implemented to find the missing intracellular metabolite concentrations.

Table S4 ... continued: Kinetic Model Reaction Parameters

| Reaction                                                                                                                                                                                                                                                                                                                                                                                                                                           | Reaction Parameters |                | Experimental Conditions |            | Value Status | Reference                       |
|----------------------------------------------------------------------------------------------------------------------------------------------------------------------------------------------------------------------------------------------------------------------------------------------------------------------------------------------------------------------------------------------------------------------------------------------------|---------------------|----------------|-------------------------|------------|--------------|---------------------------------|
|                                                                                                                                                                                                                                                                                                                                                                                                                                                    | Parameter           | Value          | pH                      | Temp. (°C) |              |                                 |
| TKT1                                                                                                                                                                                                                                                                                                                                                                                                                                               | Specific Activity   | 50.4           | 8.5                     | 30         | Taken        | Sprenger (1995)                 |
|                                                                                                                                                                                                                                                                                                                                                                                                                                                    | K_eq                | 1.2 * 0.5306   | Unknown                 | Unknown    | Taken        | Chassagnole (2002) <sup>2</sup> |
|                                                                                                                                                                                                                                                                                                                                                                                                                                                    | K_r5p               | 1.4 * 1.8394   | 8.5                     | 30         | Taken        | Sprenger (1995) <sup>2</sup>    |
|                                                                                                                                                                                                                                                                                                                                                                                                                                                    | K_xu5pD             | 0.16 * 1.7982  | 8.5                     | 30         | Taken        | Sprenger (1995) <sup>2</sup>    |
|                                                                                                                                                                                                                                                                                                                                                                                                                                                    | K_g3p               | 2.1 * 1.1312   | 8.5                     | 30         | Taken        | Sprenger (1995) <sup>2</sup>    |
|                                                                                                                                                                                                                                                                                                                                                                                                                                                    | K_s7p               | 4 * 1.3003     | 8.5                     | 30         | Taken        | Sprenger (1995) <sup>2</sup>    |
| TKT2                                                                                                                                                                                                                                                                                                                                                                                                                                               | Specific Activity   | 50.4           | 8.5                     | 30         | Taken        | Sprenger (1995)                 |
|                                                                                                                                                                                                                                                                                                                                                                                                                                                    | K_eq                | 10 * 1.2310    | Unknown                 | Unknown    | Taken        | Chassagnole (2002) <sup>2</sup> |
|                                                                                                                                                                                                                                                                                                                                                                                                                                                    | K_e4p               | 0.09 * 0.8301  | 8.5                     | 30         | Taken        | Sprenger (1995) <sup>2</sup>    |
|                                                                                                                                                                                                                                                                                                                                                                                                                                                    | K_f6p               | 1.1 * 1.8585   | 8.5                     | 30         | Taken        | Sprenger (1995) <sup>2</sup>    |
|                                                                                                                                                                                                                                                                                                                                                                                                                                                    | K_xu5pD             | 0.16 * 1.6282  | 8.5                     | 30         | Taken        | Sprenger (1995) <sup>2</sup>    |
|                                                                                                                                                                                                                                                                                                                                                                                                                                                    | K_g3p               | 2.1 * 1.0284   | 8.5                     | 30         | Taken        | Sprenger (1995) <sup>2</sup>    |
| TALA                                                                                                                                                                                                                                                                                                                                                                                                                                               | Specific Activity   | 60             | 8.5                     | 30         | Taken        | Sprenger (1995)                 |
|                                                                                                                                                                                                                                                                                                                                                                                                                                                    | K_eq                | 1.05 * 1.2148  | Unknown                 | Unknown    | Taken        | Chassagnole (2002) <sup>2</sup> |
|                                                                                                                                                                                                                                                                                                                                                                                                                                                    | K_g3p               | 0.038 * 0.5    | 8.5                     | 30         | Taken        | Sprenger (1995) <sup>2</sup>    |
|                                                                                                                                                                                                                                                                                                                                                                                                                                                    | K_e4p               | 0.09 * 1.4350  | 8.5                     | 30         | Taken        | Sprenger (1995) <sup>2</sup>    |
|                                                                                                                                                                                                                                                                                                                                                                                                                                                    | K_s7p               | 0.285 * 0.5002 | 8.5                     | 30         | Taken        | Sprenger (1995) <sup>2</sup>    |
|                                                                                                                                                                                                                                                                                                                                                                                                                                                    | K_f6p               | 1.2 * 0.9578   | 8.5                     | 30         | Taken        | Sprenger (1995) <sup>2</sup>    |
| <p>[1] Minimum adjustment needed to respective kinetic parameters which would ensure a stable steady state of the system. Found via optimization, discussed in the methods section.</p> <p>[2] Minimum adjustment made to respective kinetic parameters. The constant adjustment factor was found from the optimization routine (as discussed in the methods section) implemented to find the missing intracellular metabolite concentrations.</p> |                     |                |                         |            |              |                                 |
